# Supplementary material for: Exploring the Impact of Food on the Gut Ecosystem Based on the Combination of Machine Learning and Network Visualization
Source: Nutrients. 2017 Dec 1;9(12):1307. doi: 10.3390/nu9121307 (PMC5748757; doi:10.3390/nu9121307)
Supplement: Supplementary file 1 [file nutrients-09-01307-s001.pdf]

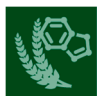

Supplementary Materials:

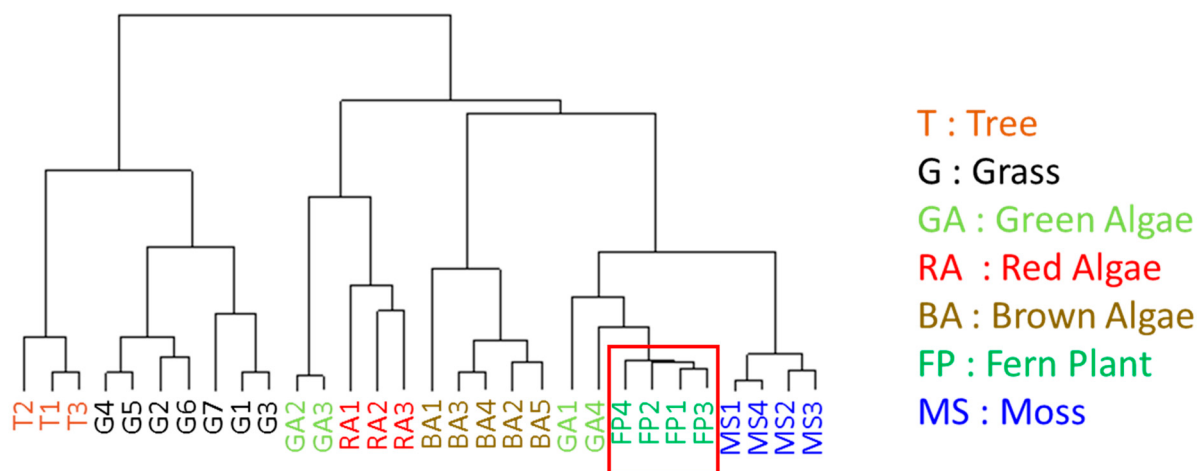

**Figure S1.** Tree diagram of plant components based on data set obtained by NMR measurement. This image is a modified version of a tree diagram. Raw or boiled edible parts of *Pteridium aquilinum* and *Matteuccia struthiopteris* classified at an intermediate point between moss and algae, not in higher plants, are surrounded by a red line. This image was partially revised from original presented in [31].

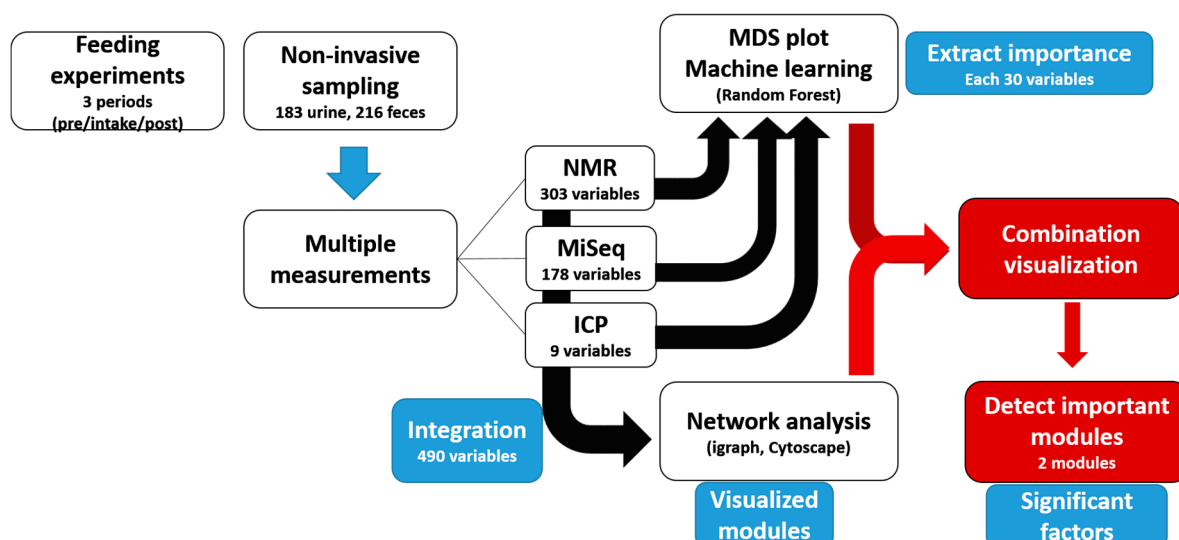

**Figure S2.** Flow chart of the analytical procedure in this study.

This flow chart indicates analytical steps. Arrows indicated experimental or analytical direction. Black arrows meant already exist methods or analysis steps. Text in the blue boxes show concept of the steps. Red arrows and box meant a novel approach developed in this study. This study shows that detection method of significant factor which respond to food intake at the final step.

**Table S1.** Information on primers used for performing microbiome analysis.

| name     | sequence                                                             |
|----------|----------------------------------------------------------------------|
| v4.SA501 | AATGATACGGCGACCACCGAGATCTACACATCGTACGTATGGTAATTGTGTGCCAGCMGCCGCGGTAA |
| v4.SA502 | AATGATACGGCGACCACCGAGATCTACACACTATCTGTATGGTAATTGTGTGCCAGCMGCCGCGGTAA |
| v4.SA503 | AATGATACGGCGACCACCGAGATCTACACTAGCGAGTTATGGTAATTGTGTGCCAGCMGCCGCGGTAA |
| v4.SA504 | AATGATACGGCGACCACCGAGATCTACACCTGCGTGTATGGTAATTGTGTGCCAGCMGCCGCGGTAA  |
| v4.SA505 | AATGATACGGCGACCACCGAGATCTACACCTATCGAGTATGGTAATTGTGTGCCAGCMGCCGCGGTAA |
| v4.SA506 | AATGATACGGCGACCACCGAGATCTACACCTGAGTGTATGGTAATTGTGTGCCAGCMGCCGCGGTAA  |
| v4.SA507 | AATGATACGGCGACCACCGAGATCTACACGATATCTTATGGTAATTGTGTGCCAGCMGCCGCGGTAA  |
| v4.SA508 | AATGATACGGCGACCACCGAGATCTACACGACACCGTTATGGTAATTGTGTGCCAGCMGCCGCGGTAA |
| v4.SB501 | AATGATACGGCGACCACCGAGATCTACACCTACTATATATGGTAATTGTGTGCCAGCMGCCGCGGTAA |
| v4.SB502 | AATGATACGGCGACCACCGAGATCTACACCTTACTATATGGTAATTGTGTGCCAGCMGCCGCGGTAA  |
| v4.SB503 | AATGATACGGCGACCACCGAGATCTACACAGAGTCACTATGGTAATTGTGTGCCAGCMGCCGCGGTAA |
| v4.SB504 | AATGATACGGCGACCACCGAGATCTACACTACGAGACTATGGTAATTGTGTGCCAGCMGCCGCGGTAA |
| v4.SB505 | AATGATACGGCGACCACCGAGATCTACACGCTCTCGTATGGTAATTGTGTGCCAGCMGCCGCGGTAA  |
| v4.SB506 | AATGATACGGCGACCACCGAGATCTACACTCGACGAGTATGGTAATTGTGTGCCAGCMGCCGCGGTAA |
| v4.SB507 | AATGATACGGCGACCACCGAGATCTACACGATCGTGTATGGTAATTGTGTGCCAGCMGCCGCGGTAA  |
| v4.SB508 | AATGATACGGCGACCACCGAGATCTACACGTCAGATATATGGTAATTGTGTGCCAGCMGCCGCGGTAA |
| v4.SA701 | CAAGCAGAAGACGGCATACGAGATACTCTCGAGTCAGTCAGCCGGACTACHVGGGTWCTAAT       |
| v4.SA702 | CAAGCAGAAGACGGCATACGAGATACTATGTCAGTCAGTCAGCCGGACTACHVGGGTWCTAAT      |
| v4.SA703 | CAAGCAGAAGACGGCATACGAGATAGTAGCTAGTCAGTCAGCCGGACTACHVGGGTWCTAAT       |
| v4.SA704 | CAAGCAGAAGACGGCATACGAGATCAGTGAGTATGTCAGTCAGCCGGACTACHVGGGTWCTAAT     |
| v4.SA705 | CAAGCAGAAGACGGCATACGAGATCGTACTCAAGTCAGTCAGCCGGACTACHVGGGTWCTAAT      |
| v4.SA706 | CAAGCAGAAGACGGCATACGAGATCTACGACAGTCACTAGTCAGCCGGACTACHVGGGTWCTAAT    |
| v4.SA707 | CAAGCAGAAGACGGCATACGAGATGGAGACTAAGTCAGTCAGCCGGACTACHVGGGTWCTAAT      |
| v4.SA708 | CAAGCAGAAGACGGCATACGAGATGTCGCTCGAGTCAGTCAGCCGGACTACHVGGGTWCTAAT      |
| v4.SA709 | CAAGCAGAAGACGGCATACGAGATGTCGTCAGTCAGTCAGCCGGACTACHVGGGTWCTAAT        |
| v4.SA710 | CAAGCAGAAGACGGCATACGAGATTACGACAGTCACTAGTCAGCCGGACTACHVGGGTWCTAAT     |
| v4.SA711 | CAAGCAGAAGACGGCATACGAGATTCATAGACAGTCAGTCAGCCGGACTACHVGGGTWCTAAT      |
| v4.SA712 | CAAGCAGAAGACGGCATACGAGATTCGCTATAAGTCAGTCAGCCGGACTACHVGGGTWCTAAT      |
| v4.SB701 | CAAGCAGAAGACGGCATACGAGATAAGTCGAGAGTCAGTCAGCCGGACTACHVGGGTWCTAAT      |
| v4.SB702 | CAAGCAGAAGACGGCATACGAGATATACTTCGAGTCAGTCAGCCGGACTACHVGGGTWCTAAT      |
| v4.SB703 | CAAGCAGAAGACGGCATACGAGATAGCTGCTAAGTCAGTCAGCCGGACTACHVGGGTWCTAAT      |
| v4.SB704 | CAAGCAGAAGACGGCATACGAGATCATAGAGAAGTCAGTCAGCCGGACTACHVGGGTWCTAAT      |
| v4.SB705 | CAAGCAGAAGACGGCATACGAGATCGTAGATCAGTCAGTCAGCCGGACTACHVGGGTWCTAAT      |
| v4.SB706 | CAAGCAGAAGACGGCATACGAGATCTCGTTACAGTCAGTCAGCCGGACTACHVGGGTWCTAAT      |
| v4.SB707 | CAAGCAGAAGACGGCATACGAGATGCGCACGTAGTCAGTCAGCCGGACTACHVGGGTWCTAAT      |
| v4.SB708 | CAAGCAGAAGACGGCATACGAGATGGTACTATAGTCAGTCAGCCGGACTACHVGGGTWCTAAT      |
| v4.SB709 | CAAGCAGAAGACGGCATACGAGATGTATACGACAGTCAGTCAGCCGGACTACHVGGGTWCTAAT     |
| v4.SB710 | CAAGCAGAAGACGGCATACGAGATTACGAGCAAGTCAGTCAGCCGGACTACHVGGGTWCTAAT      |
| v4.SB711 | CAAGCAGAAGACGGCATACGAGATTCAGCGTTAGTCAGTCAGCCGGACTACHVGGGTWCTAAT      |
| v4.SB712 | CAAGCAGAAGACGGCATACGAGATTCGCTACGAGTCAGTCAGCCGGACTACHVGGGTWCTAAT      |
| v4.SB501 | AATGATACGGCGACCACCGAGATCTACACCTACTATATATGGTAATTGTGTGCCAGCMGCCGCGGTAA |
| v4.SB502 | AATGATACGGCGACCACCGAGATCTACACCTTACTATATGGTAATTGTGTGCCAGCMGCCGCGGTAA  |
| v4.SB503 | AATGATACGGCGACCACCGAGATCTACACAGAGTCACTATGGTAATTGTGTGCCAGCMGCCGCGGTAA |
| v4.SB504 | AATGATACGGCGACCACCGAGATCTACACTACGAGACTATGGTAATTGTGTGCCAGCMGCCGCGGTAA |
| v4.SB505 | AATGATACGGCGACCACCGAGATCTACACGCTCTCGTATGGTAATTGTGTGCCAGCMGCCGCGGTAA  |
| v4.SB506 | AATGATACGGCGACCACCGAGATCTACACTCGACGAGTATGGTAATTGTGTGCCAGCMGCCGCGGTAA |
| v4.SB507 | AATGATACGGCGACCACCGAGATCTACACGATCGTGTATGGTAATTGTGTGCCAGCMGCCGCGGTAA  |
| v4.SB508 | AATGATACGGCGACCACCGAGATCTACACGTCAGATATATGGTAATTGTGTGCCAGCMGCCGCGGTAA |
| v4.SB701 | CAAGCAGAAGACGGCATACGAGATAAGTCGAGAGTCAGTCAGCCGGACTACHVGGGTWCTAAT      |
| v4.SB702 | CAAGCAGAAGACGGCATACGAGATATACTTCGAGTCAGTCAGCCGGACTACHVGGGTWCTAAT      |
| v4.SB703 | CAAGCAGAAGACGGCATACGAGATAGCTGCTAAGTCAGTCAGCCGGACTACHVGGGTWCTAAT      |
| v4.SB704 | CAAGCAGAAGACGGCATACGAGATCATAGAGAAGTCAGTCAGCCGGACTACHVGGGTWCTAAT      |
| v4.SB705 | CAAGCAGAAGACGGCATACGAGATCGTAGATCAGTCAGTCAGCCGGACTACHVGGGTWCTAAT      |
| v4.SB706 | CAAGCAGAAGACGGCATACGAGATCTCGTTACAGTCAGTCAGCCGGACTACHVGGGTWCTAAT      |
| v4.SB707 | CAAGCAGAAGACGGCATACGAGATGCGCACGTAGTCAGTCAGCCGGACTACHVGGGTWCTAAT      |
| v4.SB708 | CAAGCAGAAGACGGCATACGAGATGGTACTATAGTCAGTCAGCCGGACTACHVGGGTWCTAAT      |
| v4.SB709 | CAAGCAGAAGACGGCATACGAGATGTATACGACAGTCAGTCAGCCGGACTACHVGGGTWCTAAT     |
| v4.SB710 | CAAGCAGAAGACGGCATACGAGATTACGAGCAAGTCAGTCAGCCGGACTACHVGGGTWCTAAT      |
| v4.SB711 | CAAGCAGAAGACGGCATACGAGATTACGCTTATAGTCAGTCAGCCGGACTACHVGGGTWCTAAT     |
| v4.SB712 | CAAGCAGAAGACGGCATACGAGATTCGCTACGAGTCAGTCAGCCGGACTACHVGGGTWCTAAT      |

This primer information is referenced from a previous report [41].

**Table S2.** List of sequential numbers for bacterial detection by MiSeq analysis. Numbers in all Figures are equivalent to bacterial names in this list.

|       |                                                                                                               |
|-------|---------------------------------------------------------------------------------------------------------------|
| No.1  | k__Bacteria;Other;Other;Other;Other;Other                                                                     |
| No.2  | k__Bacteria;p__Actinobacteria;Other;Other;Other;Other                                                         |
| No.3  | k__Bacteria;p__Actinobacteria;c__Actinobacteria;o__Actinomycetales;f__Brevibacteriaceae;g__Brevibacterium     |
| No.4  | k__Bacteria;p__Actinobacteria;c__Actinobacteria;o__Actinomycetales;f__Corynebacteriaceae;g__Corynebacterium   |
| No.5  | k__Bacteria;p__Actinobacteria;c__Actinobacteria;o__Actinomycetales;f__Geodermatophilaceae;Other               |
| No.6  | k__Bacteria;p__Actinobacteria;c__Actinobacteria;o__Actinomycetales;f__Micrococcaceae;g__Kocuria               |
| No.7  | k__Bacteria;p__Actinobacteria;c__Actinobacteria;o__Actinomycetales;f__Micrococcaceae;g__Renibacterium         |
| No.8  | k__Bacteria;p__Actinobacteria;c__Actinobacteria;o__Actinomycetales;f__Mycobacteriaceae;g__Mycobacterium       |
| No.9  | k__Bacteria;p__Actinobacteria;c__Actinobacteria;o__Actinomycetales;f__Pseudonocardiaceae;Other                |
| No.10 | k__Bacteria;p__Actinobacteria;c__Coriobacteriia;o__Coriobacteriales;f__Coriobacteriaceae;Other                |
| No.11 | k__Bacteria;p__Actinobacteria;c__Coriobacteriia;o__Coriobacteriales;f__Coriobacteriaceae;g__                  |
| No.12 | k__Bacteria;p__Actinobacteria;c__Coriobacteriia;o__Coriobacteriales;f__Coriobacteriaceae;g__Adlercreutzia     |
| No.13 | k__Bacteria;p__Actinobacteria;c__Thermoleophilia;o__Gaiellales;f__AK1AB1_02E;g__                              |
| No.14 | k__Bacteria;p__Bacteroidetes;Other;Other;Other;Other                                                          |
| No.15 | k__Bacteria;p__Bacteroidetes;c__Bacteroidia;o__Bacteroidales;Other;Other                                      |
| No.16 | k__Bacteria;p__Bacteroidetes;c__Bacteroidia;o__Bacteroidales;f__Porphyromonadaceae;g__Parabacteroides         |
| No.17 | k__Bacteria;p__Bacteroidetes;c__Bacteroidia;o__Bacteroidales;f__Prevotellaceae;Other                          |
| No.18 | k__Bacteria;p__Bacteroidetes;c__Bacteroidia;o__Bacteroidales;f__Prevotellaceae;g__Prevotella                  |
| No.19 | k__Bacteria;p__Bacteroidetes;c__Bacteroidia;o__Bacteroidales;f__Rikenellaceae;Other                           |
| No.20 | k__Bacteria;p__Bacteroidetes;c__Bacteroidia;o__Bacteroidales;f__Rikenellaceae;g__                             |
| No.21 | k__Bacteria;p__Bacteroidetes;c__Bacteroidia;o__Bacteroidales;f__S24-7;g__                                     |
| No.22 | k__Bacteria;p__Bacteroidetes;c__Bacteroidia;o__Bacteroidales;f__[Barnesiellaceae];g__                         |
| No.23 | k__Bacteria;p__Bacteroidetes;c__Flavobacteriia;o__Flavobacteriales;Other;Other                                |
| No.24 | k__Bacteria;p__Bacteroidetes;c__Flavobacteriia;o__Flavobacteriales;f__;g__                                    |
| No.25 | k__Bacteria;p__Bacteroidetes;c__Flavobacteriia;o__Flavobacteriales;f__Cryomorphaceae;g__Cryomorpha            |
| No.26 | k__Bacteria;p__Bacteroidetes;c__Flavobacteriia;o__Flavobacteriales;f__Flavobacteriaceae;Other                 |
| No.27 | k__Bacteria;p__Bacteroidetes;c__Flavobacteriia;o__Flavobacteriales;f__Flavobacteriaceae;g__Ascidianibacter    |
| No.28 | k__Bacteria;p__Bacteroidetes;c__Flavobacteriia;o__Flavobacteriales;f__Flavobacteriaceae;g__Polaribacter       |
| No.29 | k__Bacteria;p__Bacteroidetes;c__Flavobacteriia;o__Flavobacteriales;f__Flavobacteriaceae;g__Sediminicola       |
| No.30 | k__Bacteria;p__Bacteroidetes;c__Flavobacteriia;o__Flavobacteriales;f__[Weeksellaceae];g__Chryseobacterium     |
| No.31 | k__Bacteria;p__Bacteroidetes;c__Flavobacteriia;o__Flavobacteriales;f__[Weeksellaceae];g__Cloacibacterium      |
| No.32 | k__Bacteria;p__Bacteroidetes;c__[Rhodothermii];o__[Rhodothermales];f__Rhodothermaceae;g__                     |
| No.33 | k__Bacteria;p__Bacteroidetes;c__[Saprospirae];o__[Saprospirales];f__Chitinophagaceae;g__Lacibacter            |
| No.34 | k__Bacteria;p__Bacteroidetes;c__[Saprospirae];o__[Saprospirales];f__Chitinophagaceae;g__Sediminibacterium     |
| No.35 | k__Bacteria;p__Bacteroidetes;c__[Saprospirae];o__[Saprospirales];f__Saprospiraceae;g__                        |
| No.36 | k__Bacteria;p__Chlamydiae;c__Chlamydia;o__Chlamydiales;Other;Other                                            |
| No.37 | k__Bacteria;p__Chlamydiae;c__Chlamydia;o__Chlamydiales;f__;g__                                                |
| No.38 | k__Bacteria;p__Cyanobacteria;Other;Other;Other;Other                                                          |
| No.39 | k__Bacteria;p__Cyanobacteria;c__4C0d-2;o__YS2;f__;g__                                                         |
| No.40 | k__Bacteria;p__Cyanobacteria;c__Chloroplast;o__Stramenopiles;f__;g__                                          |
| No.41 | k__Bacteria;p__Cyanobacteria;c__Chloroplast;o__Streptophyta;f__;g__                                           |
| No.42 | k__Bacteria;p__Cyanobacteria;c__Oscillatoriothycidae;Other;Other;Other                                        |
| No.43 | k__Bacteria;p__Cyanobacteria;c__Oscillatoriothycidae;o__Chroococcales;f__Xenococcaceae;g__                    |
| No.44 | k__Bacteria;p__Deferribacteres;c__Deferribacteres;o__Deferribacterales;f__Deferribacteraceae;g__Mucispirillum |
| No.45 | k__Bacteria;p__Firmicutes;Other;Other;Other;Other                                                             |
| No.46 | k__Bacteria;p__Firmicutes;c__Bacilli;Other;Other;Other                                                        |
| No.47 | k__Bacteria;p__Firmicutes;c__Bacilli;o__Bacillales;f__Bacillaceae;g__Bacillus                                 |
| No.48 | k__Bacteria;p__Firmicutes;c__Bacilli;o__Bacillales;f__Bacillaceae;g__Oceanobacillus                           |
| No.49 | k__Bacteria;p__Firmicutes;c__Bacilli;o__Bacillales;f__Staphylococcaceae;g__Jeotgalicoccus                     |
| No.50 | k__Bacteria;p__Firmicutes;c__Bacilli;o__Bacillales;f__Staphylococcaceae;g__Staphylococcus                     |

Table S2. (Continued)

|        |                                                                                                       |
|--------|-------------------------------------------------------------------------------------------------------|
| No.51  | k_Bacteria;p_Firmicutes;c_Bacilli;o_Lactobacillales;Other;Other                                       |
| No.52  | k_Bacteria;p_Firmicutes;c_Bacilli;o_Lactobacillales;f_Aerococcaceae;g_                                |
| No.53  | k_Bacteria;p_Firmicutes;c_Bacilli;o_Lactobacillales;f_Enterococcaceae;Other                           |
| No.54  | k_Bacteria;p_Firmicutes;c_Bacilli;o_Lactobacillales;f_Lactobacillaceae;Other                          |
| No.55  | k_Bacteria;p_Firmicutes;c_Bacilli;o_Lactobacillales;f_Lactobacillaceae;g_Lactobacillus                |
| No.56  | k_Bacteria;p_Firmicutes;c_Bacilli;o_Lactobacillales;f_Leuconostocaceae;Other                          |
| No.57  | k_Bacteria;p_Firmicutes;c_Bacilli;o_Lactobacillales;f_Streptococcaceae;g_Lactococcus                  |
| No.58  | k_Bacteria;p_Firmicutes;c_Bacilli;o_Lactobacillales;f_Streptococcaceae;g_Streptococcus                |
| No.59  | k_Bacteria;p_Firmicutes;c_Bacilli;o_Turicibacterales;f_Turicibacteraceae;g_Turicibacter               |
| No.60  | k_Bacteria;p_Firmicutes;c_Clostridia;Other;Other;Other                                                |
| No.61  | k_Bacteria;p_Firmicutes;c_Clostridia;o_Clostridiales;Other;Other                                      |
| No.62  | k_Bacteria;p_Firmicutes;c_Clostridia;o_Clostridiales;f_ ;g_                                           |
| No.63  | k_Bacteria;p_Firmicutes;c_Clostridia;o_Clostridiales;f_Clostridiaceae;Other                           |
| No.64  | k_Bacteria;p_Firmicutes;c_Clostridia;o_Clostridiales;f_Clostridiaceae;g_Clostridium                   |
| No.65  | k_Bacteria;p_Firmicutes;c_Clostridia;o_Clostridiales;f_Dehalobacteriaceae;g_Dehalobacterium           |
| No.66  | k_Bacteria;p_Firmicutes;c_Clostridia;o_Clostridiales;f_Eubacteriaceae;g_Anaerofustis                  |
| No.67  | k_Bacteria;p_Firmicutes;c_Clostridia;o_Clostridiales;f_Lachnospiraceae;Other                          |
| No.68  | k_Bacteria;p_Firmicutes;c_Clostridia;o_Clostridiales;f_Lachnospiraceae;g_                             |
| No.69  | k_Bacteria;p_Firmicutes;c_Clostridia;o_Clostridiales;f_Lachnospiraceae;g_Anaerostipes                 |
| No.70  | k_Bacteria;p_Firmicutes;c_Clostridia;o_Clostridiales;f_Lachnospiraceae;g_Blautia                      |
| No.71  | k_Bacteria;p_Firmicutes;c_Clostridia;o_Clostridiales;f_Lachnospiraceae;g_Clostridium                  |
| No.72  | k_Bacteria;p_Firmicutes;c_Clostridia;o_Clostridiales;f_Lachnospiraceae;g_Coproccoccus                 |
| No.73  | k_Bacteria;p_Firmicutes;c_Clostridia;o_Clostridiales;f_Lachnospiraceae;g_Dorea                        |
| No.74  | k_Bacteria;p_Firmicutes;c_Clostridia;o_Clostridiales;f_Lachnospiraceae;g_Epulisplacium                |
| No.75  | k_Bacteria;p_Firmicutes;c_Clostridia;o_Clostridiales;f_Lachnospiraceae;g_Roseburia                    |
| No.76  | k_Bacteria;p_Firmicutes;c_Clostridia;o_Clostridiales;f_Lachnospiraceae;g_[Ruminococcus]               |
| No.77  | k_Bacteria;p_Firmicutes;c_Clostridia;o_Clostridiales;f_Peptococcaceae;g_                              |
| No.78  | k_Bacteria;p_Firmicutes;c_Clostridia;o_Clostridiales;f_Peptostreptococcaceae;Other                    |
| No.79  | k_Bacteria;p_Firmicutes;c_Clostridia;o_Clostridiales;f_Ruminococcaceae;Other                          |
| No.80  | k_Bacteria;p_Firmicutes;c_Clostridia;o_Clostridiales;f_Ruminococcaceae;g_                             |
| No.81  | k_Bacteria;p_Firmicutes;c_Clostridia;o_Clostridiales;f_Ruminococcaceae;g_Anaerotruncus                |
| No.82  | k_Bacteria;p_Firmicutes;c_Clostridia;o_Clostridiales;f_Ruminococcaceae;g_Butyricoccus                 |
| No.83  | k_Bacteria;p_Firmicutes;c_Clostridia;o_Clostridiales;f_Ruminococcaceae;g_Clostridium                  |
| No.84  | k_Bacteria;p_Firmicutes;c_Clostridia;o_Clostridiales;f_Ruminococcaceae;g_Faecalibacterium             |
| No.85  | k_Bacteria;p_Firmicutes;c_Clostridia;o_Clostridiales;f_Ruminococcaceae;g_Oscillospira                 |
| No.86  | k_Bacteria;p_Firmicutes;c_Clostridia;o_Clostridiales;f_Ruminococcaceae;g_Ruminococcus                 |
| No.87  | k_Bacteria;p_Firmicutes;c_Clostridia;o_Clostridiales;f_Veillonellaceae;g_Veillonella                  |
| No.88  | k_Bacteria;p_Firmicutes;c_Clostridia;o_Clostridiales;f_[Mogibacteriaceae];Other                       |
| No.89  | k_Bacteria;p_Firmicutes;c_Clostridia;o_Clostridiales;f_[Mogibacteriaceae];g_                          |
| No.90  | k_Bacteria;p_Firmicutes;c_Clostridia;o_Clostridiales;f_[Tissierellaceae];g_Anaerococcus               |
| No.91  | k_Bacteria;p_Firmicutes;c_Erysipelotrichi;o_Erysipelotrichales;f_Erysipelotrichaceae;Other            |
| No.92  | k_Bacteria;p_Firmicutes;c_Erysipelotrichi;o_Erysipelotrichales;f_Erysipelotrichaceae;g_               |
| No.93  | k_Bacteria;p_Firmicutes;c_Erysipelotrichi;o_Erysipelotrichales;f_Erysipelotrichaceae;g_Allobaculum    |
| No.94  | k_Bacteria;p_Firmicutes;c_Erysipelotrichi;o_Erysipelotrichales;f_Erysipelotrichaceae;g_Clostridium    |
| No.95  | k_Bacteria;p_Firmicutes;c_Erysipelotrichi;o_Erysipelotrichales;f_Erysipelotrichaceae;g_Coproccoccus   |
| No.96  | k_Bacteria;p_Firmicutes;c_Erysipelotrichi;o_Erysipelotrichales;f_Erysipelotrichaceae;g_Erysipelothrix |
| No.97  | k_Bacteria;p_Fusobacteria;c_Fusobacteriia;o_Fusobacteriales;f_Fusobacteriaceae;g_Cetobacterium        |
| No.98  | k_Bacteria;p_Fusobacteria;c_Fusobacteriia;o_Fusobacteriales;f_Leptotrichiaceae;g_Leptotrichia         |
| No.99  | k_Bacteria;p_Lentisphaerae;c_[Lentisphaeria];o_Lentisphaerales;f_Lentisphaeraceae;g_                  |
| No.100 | k_Bacteria;p_Planctomycetes;c_OM190;o_agg27;f_ ;g_                                                    |

Table S2. (Continued)

|        |                                                                                                              |
|--------|--------------------------------------------------------------------------------------------------------------|
| No.101 | k_Bacteria;p_Planctomycetes;c_Planctomycetia;o_Gemmatales;f_Gemmataceae;g_                                   |
| No.102 | k_Bacteria;p_Planctomycetes;c_Planctomycetia;o_Pirellulales;f_Pirellulaceae;g_                               |
| No.103 | k_Bacteria;p_Proteobacteria;Other;Other;Other;Other                                                          |
| No.104 | k_Bacteria;p_Proteobacteria;c_Alphaproteobacteria;Other;Other;Other                                          |
| No.105 | k_Bacteria;p_Proteobacteria;c_Alphaproteobacteria;o_Caulobacterales;f_Caulobacteraceae;Other                 |
| No.106 | k_Bacteria;p_Proteobacteria;c_Alphaproteobacteria;o_Rhizobiales;Other;Other                                  |
| No.107 | k_Bacteria;p_Proteobacteria;c_Alphaproteobacteria;o_Rhizobiales;f_Bradyrhizobiaceae;Other                    |
| No.108 | k_Bacteria;p_Proteobacteria;c_Alphaproteobacteria;o_Rhizobiales;f_Bradyrhizobiaceae;g_Balneimonas            |
| No.109 | k_Bacteria;p_Proteobacteria;c_Alphaproteobacteria;o_Rhizobiales;f_Bradyrhizobiaceae;g_Bradyrhizobium         |
| No.110 | k_Bacteria;p_Proteobacteria;c_Alphaproteobacteria;o_Rhizobiales;f_Hyphomicrobiaceae;Other                    |
| No.111 | k_Bacteria;p_Proteobacteria;c_Alphaproteobacteria;o_Rhizobiales;f_Methylobacteriaceae;g_                     |
| No.112 | k_Bacteria;p_Proteobacteria;c_Alphaproteobacteria;o_Rhizobiales;f_Methylobacteriaceae;g_Methylobacterium     |
| No.113 | k_Bacteria;p_Proteobacteria;c_Alphaproteobacteria;o_Rhizobiales;f_Phyllobacteriaceae;Other                   |
| No.114 | k_Bacteria;p_Proteobacteria;c_Alphaproteobacteria;o_Rhizobiales;f_Phyllobacteriaceae;g_Phyllobacterium       |
| No.115 | k_Bacteria;p_Proteobacteria;c_Alphaproteobacteria;o_Rhizobiales;f_Rhizobiaceae;Other                         |
| No.116 | k_Bacteria;p_Proteobacteria;c_Alphaproteobacteria;o_Rhizobiales;f_Xanthobacteraceae;g_                       |
| No.117 | k_Bacteria;p_Proteobacteria;c_Alphaproteobacteria;o_Rhodobacterales;f_Rhodobacteraceae;Other                 |
| No.118 | k_Bacteria;p_Proteobacteria;c_Alphaproteobacteria;o_Rhodobacterales;f_Rhodobacteraceae;g_Loktanella          |
| No.119 | k_Bacteria;p_Proteobacteria;c_Alphaproteobacteria;o_Rhodobacterales;f_Rhodobacteraceae;g_Paracoccus          |
| No.120 | k_Bacteria;p_Proteobacteria;c_Alphaproteobacteria;o_Rhodobacterales;f_Rhodobacteraceae;g_Phaeobacter         |
| No.121 | k_Bacteria;p_Proteobacteria;c_Alphaproteobacteria;o_Rhodobacterales;f_Rhodobacteraceae;g_Rhodobacter         |
| No.122 | k_Bacteria;p_Proteobacteria;c_Alphaproteobacteria;o_Rhodospirillales;f_Acetobacteraceae;Other                |
| No.123 | k_Bacteria;p_Proteobacteria;c_Alphaproteobacteria;o_Rhodospirillales;f_Acetobacteraceae;g_Roseomonas         |
| No.124 | k_Bacteria;p_Proteobacteria;c_Alphaproteobacteria;o_Rhodospirillales;f_Rhodospirillaceae;Other               |
| No.125 | k_Bacteria;p_Proteobacteria;c_Alphaproteobacteria;o_Rickettsiales;f_mitochondria;Other                       |
| No.126 | k_Bacteria;p_Proteobacteria;c_Alphaproteobacteria;o_Sphingomonadales;f_Erythrobacteraceae;Other              |
| No.127 | k_Bacteria;p_Proteobacteria;c_Alphaproteobacteria;o_Sphingomonadales;f_Sphingomonadaceae;Other               |
| No.128 | k_Bacteria;p_Proteobacteria;c_Alphaproteobacteria;o_Sphingomonadales;f_Sphingomonadaceae;g_Sphingomonas      |
| No.129 | k_Bacteria;p_Proteobacteria;c_Betaproteobacteria;o_Burkholderiales;f_Alcaligenaceae;g_Achromobacter          |
| No.130 | k_Bacteria;p_Proteobacteria;c_Betaproteobacteria;o_Burkholderiales;f_Comamonadaceae;Other                    |
| No.131 | k_Bacteria;p_Proteobacteria;c_Betaproteobacteria;o_Burkholderiales;f_Comamonadaceae;g_Comamonas              |
| No.132 | k_Bacteria;p_Proteobacteria;c_Betaproteobacteria;o_Burkholderiales;f_Comamonadaceae;g_Tepidimonas            |
| No.133 | k_Bacteria;p_Proteobacteria;c_Betaproteobacteria;o_Burkholderiales;f_Oxalobacteraceae;Other                  |
| No.134 | k_Bacteria;p_Proteobacteria;c_Betaproteobacteria;o_Rhodocyclales;f_Rhodocyclaceae;Other                      |
| No.135 | k_Bacteria;p_Proteobacteria;c_Deltaproteobacteria;o_Desulfovibrionales;f_Desulfovibrionaceae;g_              |
| No.136 | k_Bacteria;p_Proteobacteria;c_Deltaproteobacteria;o_Desulfovibrionales;f_Desulfovibrionaceae;g_Desulfovibrio |
| No.137 | k_Bacteria;p_Proteobacteria;c_Gammaproteobacteria;Other;Other;Other                                          |
| No.138 | k_Bacteria;p_Proteobacteria;c_Gammaproteobacteria;o_Alteromonadales;Other;Other                              |
| No.139 | k_Bacteria;p_Proteobacteria;c_Gammaproteobacteria;o_Alteromonadales;f_Alteromonadaceae;g_Alteromonas         |
| No.140 | k_Bacteria;p_Proteobacteria;c_Gammaproteobacteria;o_Alteromonadales;f_Alteromonadaceae;g_BD2-13              |
| No.141 | k_Bacteria;p_Proteobacteria;c_Gammaproteobacteria;o_Alteromonadales;f_Alteromonadaceae;g_Marinobacter        |
| No.142 | k_Bacteria;p_Proteobacteria;c_Gammaproteobacteria;o_Alteromonadales;f_Colwelliaceae;Other                    |
| No.143 | k_Bacteria;p_Proteobacteria;c_Gammaproteobacteria;o_Alteromonadales;f_Colwelliaceae;g_                       |
| No.144 | k_Bacteria;p_Proteobacteria;c_Gammaproteobacteria;o_Alteromonadales;f_Idiomarinaceae;g_Idiomarina            |
| No.145 | k_Bacteria;p_Proteobacteria;c_Gammaproteobacteria;o_Alteromonadales;f_OM60;g_                                |
| No.146 | k_Bacteria;p_Proteobacteria;c_Gammaproteobacteria;o_Alteromonadales;f_Shewanellaceae;g_Shewanella            |
| No.147 | k_Bacteria;p_Proteobacteria;c_Gammaproteobacteria;o_Enterobacteriales;f_Enterobacteriaceae;Other             |
| No.148 | k_Bacteria;p_Proteobacteria;c_Gammaproteobacteria;o_Enterobacteriales;f_Enterobacteriaceae;g_Serratia        |
| No.149 | k_Bacteria;p_Proteobacteria;c_Gammaproteobacteria;o_HTCC2188;f_HTCC2089;g_                                   |
| No.150 | k_Bacteria;p_Proteobacteria;c_Gammaproteobacteria;o_Legionellales;f_Legionellaceae;Other                     |

Table S2. (Continued)

---

|        |   |            |                   |                       |                      |                          |                   |
|--------|---|------------|-------------------|-----------------------|----------------------|--------------------------|-------------------|
| No.151 | k | Bacteria;p | Proteobacteria;c  | Gammaproteobacteria;o | Legionellales;f      | Legionellaceae;g         |                   |
| No.152 | k | Bacteria;p | Proteobacteria;c  | Gammaproteobacteria;o | Oceanospirillales;f  | Alcanivoracaceae;g       | Alcanivorax       |
| No.153 | k | Bacteria;p | Proteobacteria;c  | Gammaproteobacteria;o | Oceanospirillales;f  | Halomonadaceae;g         | Halomonas         |
| No.154 | k | Bacteria;p | Proteobacteria;c  | Gammaproteobacteria;o | Oceanospirillales;f  | Oceanospirillaceae;g     | Oleibacter        |
| No.155 | k | Bacteria;p | Proteobacteria;c  | Gammaproteobacteria;o | Oceanospirillales;f  | Oceanospirillaceae;g     | Oleispira         |
| No.156 | k | Bacteria;p | Proteobacteria;c  | Gammaproteobacteria;o | Oceanospirillales;f  | Oceanospirillaceae;g     | Spongiispira      |
| No.157 | k | Bacteria;p | Proteobacteria;c  | Gammaproteobacteria;o | Pseudomonadales;f    | Moraxellaceae;g          | Acinetobacter     |
| No.158 | k | Bacteria;p | Proteobacteria;c  | Gammaproteobacteria;o | Pseudomonadales;f    | Moraxellaceae;g          | Enhydrobacter     |
| No.159 | k | Bacteria;p | Proteobacteria;c  | Gammaproteobacteria;o | Pseudomonadales;f    | Pseudomonadaceae;Other   |                   |
| No.160 | k | Bacteria;p | Proteobacteria;c  | Gammaproteobacteria;o | Pseudomonadales;f    | Pseudomonadaceae;g       | Pseudomonas       |
| No.161 | k | Bacteria;p | Proteobacteria;c  | Gammaproteobacteria;o | Thiotrichales;f      | Piscirickettsiaceae;g    |                   |
| No.162 | k | Bacteria;p | Proteobacteria;c  | Gammaproteobacteria;o | Vibrionales;f        | Pseudoalteromonadaceae;g | Pseudoalteromonas |
| No.163 | k | Bacteria;p | Proteobacteria;c  | Gammaproteobacteria;o | Vibrionales;f        | Vibrionaceae;Other       |                   |
| No.164 | k | Bacteria;p | Proteobacteria;c  | Gammaproteobacteria;o | Vibrionales;f        | Vibrionaceae;g           | Photobacterium    |
| No.165 | k | Bacteria;p | Proteobacteria;c  | Gammaproteobacteria;o | Vibrionales;f        | Vibrionaceae;g           | Vibrio            |
| No.166 | k | Bacteria;p | Proteobacteria;c  | Gammaproteobacteria;o | Xanthomonadales;f    | Xanthomonadaceae;Other   |                   |
| No.167 | k | Bacteria;p | Proteobacteria;c  | Gammaproteobacteria;o | Xanthomonadales;f    | Xanthomonadaceae;g       | Stenotrophomonas  |
| No.168 | k | Bacteria;p | Proteobacteria;c  | Gammaproteobacteria;o | Xanthomonadales;f    | Xanthomonadaceae;g       | Xanthomonas       |
| No.169 | k | Bacteria;p | Proteobacteria;c  | Gammaproteobacteria;o | [Marinicellales];f   | [Marinicellaceae];g      |                   |
| No.170 | k | Bacteria;p | Proteobacteria;c  | Gammaproteobacteria;o | [Marinicellales];f   | [Marinicellaceae];g      | Marinicella       |
| No.171 | k | Bacteria;p | SBR1093;c         | EC214;o               |                      | f;g                      |                   |
| No.172 | k | Bacteria;p | Tenericutes;c     | Mollicutes;o          | Mycoplasmatales;f    | Mycoplasmataceae;g       |                   |
| No.173 | k | Bacteria;p | Tenericutes;c     | Mollicutes;o          | Mycoplasmatales;f    | Mycoplasmataceae;g       | Mycoplasma        |
| No.174 | k | Bacteria;p | Tenericutes;c     | Mollicutes;o          | RF39;f               |                          | g                 |
| No.175 | k | Bacteria;p | Verrucomicrobia;c | Verrucomicrobiae;o    | Verrucomicrobiales;f | Verrucomicrobiaceae;g    |                   |
| No.176 | k | Bacteria;p | Verrucomicrobia;c | Verrucomicrobiae;o    | Verrucomicrobiales;f | Verrucomicrobiaceae;g    | Akkermansia       |
| No.177 | k | Bacteria;p | Verrucomicrobia;c | Verrucomicrobiae;o    | Verrucomicrobiales;f | Verrucomicrobiaceae;g    | Persicirhabdus    |
| No.178 | k | Bacteria;p | [Thermi];c        | Deinococci;o          | Deinococcales;f      | Deinococcaceae;g         | Deinococcus       |

---

**Table S3.** List of annotated metabolites and unknown signals from NMR measurements.

Annotated metabolites detected by 1D and 2D NMR measurements (Figures S5, S6) (a). List of alternative names given to unknown  $^1\text{H}$  chemical shifts from urinary analysis data (b) and from fecal analysis data (c).

| a | Metabolites             |                 | $^1\text{H}$ Chemical Shift (ppm) and multiplicity                                                                                                         |
|---|-------------------------|-----------------|------------------------------------------------------------------------------------------------------------------------------------------------------------|
|   |                         |                 |                                                                                                                                                            |
|   | Acetic acid             | Ac              | 1.91 (s)                                                                                                                                                   |
|   | Acetylglycine           | AcGly           | 2.02 (s), 3.74 (d)                                                                                                                                         |
|   | Adenosine monophosphate | 3'-AMP          | 3.89 (m), 4.43 (m), 6.11 (d), 8.25 (s), 8.37 (s)                                                                                                           |
|   | a-Hydroxyisobutyrate    | HydroxyisoBuA   | 1.34 (s)                                                                                                                                                   |
|   | Allantoin               | Allantoin       | 5.37 (s)                                                                                                                                                   |
|   | Betaine                 | Betaine         | 3.25 (s), 3.89 (s)                                                                                                                                         |
|   | Butanoic acid           | BuA             | 0.88 (t), 1.55 (q), 2.15 (t)                                                                                                                               |
|   | Cholic acid             | Cholate         | 0.71 (s), 2.22 (m)                                                                                                                                         |
|   | Choline                 | Choline         | 3.20 (s), 3.50 (dd), 4.05 (m)                                                                                                                              |
|   | Cis-Aconitic acid       | Aconi           | 3.11 (d), 6.58 (s)                                                                                                                                         |
|   | Citric acid             | CiA             | 2.54 (d), 2.68 (d)                                                                                                                                         |
|   | Creatine                | Creatine        | 3.02 (s), 3.92 (s)                                                                                                                                         |
|   | Creatinine              | Creatinine      | 3.03 (s), 4.05 (s)                                                                                                                                         |
|   | Cytidine Monophosphate  | 3'-CMP          | 3.98 (dd), 4.04 (dd), 4.23 (d), 4.36 (m), 5.93 (d), 6.13 (d), 8.08 (d)                                                                                     |
|   | Deoxyadenosine          | Deoxyadenosine  | 2.56 (d), 2.82 (dd), 3.79 (dd), 3.84 (dd), 4.18 (q), 4.65 (m), 8.18 (s), 8.29 (s)                                                                          |
|   | D-Glucose               | Glc             | 3.24 (dd), 3.39 (m), 3.46 (m), 3.53 (dd), 3.70 (m), 3.83 (m), 3.89 (dd), 4.64 (d), 5.23 (d)                                                                |
|   | Dimethylamine           | DMA             | 2.71 (s)                                                                                                                                                   |
|   | Dimethylglycine         | DMG             | 2.88 (s)                                                                                                                                                   |
|   | Ethanol                 | EtOH            | 1.17 (t), 3.65 (q)                                                                                                                                         |
|   | Ethanolamine            | EtNH            | 3.13 (d), 3.81 (d)                                                                                                                                         |
|   | Formic acid             | FoA             | 8.45 (s)                                                                                                                                                   |
|   | Fumaric acid            | FuA             | 6.51 (s)                                                                                                                                                   |
|   | Galactaric acid         | Galactarate     | 3.93 (s), 4.26 (s)                                                                                                                                         |
|   | Gamma-Aminobutyric acid | GABA            | 1.89 (m), 2.29 (t), 3.00 (t)                                                                                                                               |
|   | Gluconic acid           | Gluconate       | 3.66 (m), 3.76 (m), 3.82 (m), 4.12 (d)                                                                                                                     |
|   | Glucuronate             | Glucuronate     | 3.28 (t), 3.57 (dd), 3.72 (m), 4.07 (d), 4.63 (d), 5.23 (d)                                                                                                |
|   | Glycine                 | Gly             | 3.55 (s)                                                                                                                                                   |
|   | Guanidinoacetic acid    | GuanAc          | 3.78 (s)                                                                                                                                                   |
|   | Guanosine               | Guanosine       | 3.82 (d), 3.87 (d), 4.22 (q), 4.41 (dd), 5.09 (d)                                                                                                          |
|   | Hippuric acid           | Hippurate       | 3.95 (d), 7.54 (m), 7.62 (t), 7.82 (dd)                                                                                                                    |
|   | Homovanillic acid       | Homovanillate   | 3.44 (s), 3.86 (s), 6.77 (dd), 6.87 (d), 6.96 (d)                                                                                                          |
|   | Hypotaurine             | Hypotaurine     | 2.64 (t), 3.34 (t)                                                                                                                                         |
|   | Inosine                 | Inosine         | 3.83 (dd), 3.90 (dd), 4.26 (dd), 6.06 (d), 8.19 (s)                                                                                                        |
|   | Inosinemonophosphate    | IMP             | 4.03 (m), 4.36 (dd), 4.50 (dd), 6.14 (d), 8.21 (s)                                                                                                         |
|   | Isovalerylglycine       | IsovalerylGly   | 0.93 (d), 2.16 (d), 3.75 (d)                                                                                                                               |
|   | Itaconic acid           | Itaconate       | 3.40 (s), 5.85 (s)                                                                                                                                         |
|   | L-Acetylcarnithine      | AcCarni         | 2.12 (s), 2.48 (dd), 2.61 (dd), 3.18 (s), 3.61 (d), 3.82 (dd)                                                                                              |
|   | Lactic acid             | Lactate         | 1.32 (d), 4.10 (q)                                                                                                                                         |
|   | L-Alanine               | Ala             | 1.47 (d), 3.76 (q)                                                                                                                                         |
|   | L-Asparagine            | Asn             | 2.85 (m), 2.94 (m), 4.00 (dd)                                                                                                                              |
|   | L-Aspartic acid         | Asp             | 2.67 (dd), 2.80 (dd), 3.89 (dd)                                                                                                                            |
|   | L-Glutamic acid         | Glu             | 2.05 (m), 2.11 (m), 2.34 (m), 3.74 (dd)                                                                                                                    |
|   | L-Glutamine             | Gln             | 2.12 (m), 2.44 (m), 3.76 (t)                                                                                                                               |
|   | L-Isoleucine            | Ile             | 0.93 (t), 1.00 (d), 1.25 (m), 1.45 (m), 1.96 (m), 3.66 (d)                                                                                                 |
|   | L-Leucine               | Leu             | 0.95 (t), 1.70 (m), 3.73 (m)                                                                                                                               |
|   | L-Lysine                | Lys             | 1.46 (m), 1.72 (m), 1.89 (m), 3.01 (t), 3.74 (t)                                                                                                           |
|   | L-Methionine            | Met             | 2.15 (m), 2.63 (t), 3.85 (dd)                                                                                                                              |
|   | L-Phenylalanine         | Phe             | 3.19 (m), 3.98 (dd), 7.32 (d), 7.36 (m), 7.42 (m)                                                                                                          |
|   | L-Serine                | Ser             | 3.83 (dd), 3.96 (s)                                                                                                                                        |
|   | L-Threonine             | Thr             | 1.31 (d), 3.58 (d), 4.25 (m)                                                                                                                               |
|   | L-Tyrosine              | Tyr             | 3.02 (dd), 3.17 (dd), 3.92 (dd), 6.89 (d), 7.17 (m)                                                                                                        |
|   | L-Valine                | Val             | 0.98 (d), 1.03 (d), 2.27 (m), 3.60 (d)                                                                                                                     |
|   | Methanol                | MtOH            | 3.34 (s)                                                                                                                                                   |
|   | Methylamine             | Methylamine     | 2.59 (s)                                                                                                                                                   |
|   | N-Acetyl                | N-Act           | 2.05 (s)                                                                                                                                                   |
|   | Propionic acid          | PrA             | 1.05 (t), 2.17 (q)                                                                                                                                         |
|   | Putrescine              | Putrescine      | 1.76 (t), 3.04 (t)                                                                                                                                         |
|   | Sarcosine               | Sarcosine       | 2.74 (s), 3.60 (s)                                                                                                                                         |
|   | Succinic acid           | SuA             | 2.40 (s)                                                                                                                                                   |
|   | Taurine                 | Taurine         | 3.26 (t), 3.42 (t)                                                                                                                                         |
|   | Trigonelline            | Trigonelline    | 4.43 (s), 8.07 (m), 8.82 (m), 9.11 (s)                                                                                                                     |
|   | Trimethylamine          | TMA             | 2.88 (s)                                                                                                                                                   |
|   | Uridine                 | Uridine         | 3.80 (dd), 3.90 (dd), 4.12 (m), 4.22 (dd), 4.34 (dd), 5.89 (d), 5.90 (d), 7.86 (d)                                                                         |
|   | Urocanic acid           | Urocanate       | 6.39 (d), 7.28 (d), 7.37 (s), 7.85 (s)                                                                                                                     |
|   | Xylobiose               | Xyl             | 2.91 (m), 3.22 (dd), 3.25 (m), 3.30 (m), 3.37 (dd), 3.42 (t), 3.54 (t), 3.62 (m), 3.68 (dd), 3.77 (m), 3.92 (dd), 3.97 (dd), 4.05 (dd), 4.45 (d), 4.58 (d) |
|   | 2-oxoglutarate          | 2Oxoglutarate   | 2.42 (t), 3.00 (t)                                                                                                                                         |
|   | 2-oxoisovaleric acid    | 2Oxoisovalerate | 0.82 (s), 0.95 (d), 2.01 (m), 3.84 (d)                                                                                                                     |
|   | 2-oxopentanoic acid     | 2Oxopentanoate  | 0.91 (t), 1.61 (m)                                                                                                                                         |
|   | 3-ureidopropionate      | 3-UrPrA         | 2.72 (t), 3.29 (t)                                                                                                                                         |
|   | 4-amino-hippurate       | 4aminoHippurate | 3.89 (d), 6.85 (d), 7.66 (d)                                                                                                                               |

b

| Unknown <sup>1</sup> H Chemical Shift (ppm) |      |        |      |
|---------------------------------------------|------|--------|------|
| ROI.1                                       | 1.24 | ROI.32 | 3.64 |
| ROI.2                                       | 3.14 | ROI.33 | 3.85 |
| ROI.3                                       | 0.87 | ROI.34 | 3.94 |
| ROI.4                                       | 0.88 | ROI.35 | 4.12 |
| ROI.5                                       | 0.90 | ROI.36 | 4.14 |
| ROI.6                                       | 1.09 | ROI.37 | 4.29 |
| ROI.7                                       | 1.11 | ROI.38 | 4.47 |
| ROI.8                                       | 1.20 | ROI.39 | 4.51 |
| ROI.9                                       | 1.22 | ROI.40 | 4.55 |
| ROI.10                                      | 1.35 | ROI.41 | 4.57 |
| ROI.11                                      | 1.36 | ROI.42 | 5.01 |
| ROI.12                                      | 1.48 | ROI.43 | 5.37 |
| ROI.13                                      | 1.76 | ROI.44 | 5.70 |
| ROI.14                                      | 1.97 | ROI.45 | 6.53 |
| ROI.15                                      | 1.99 | ROI.46 | 6.72 |
| ROI.16                                      | 2.06 | ROI.47 | 6.84 |
| ROI.17                                      | 2.08 | ROI.48 | 6.86 |
| ROI.18                                      | 2.24 | ROI.49 | 6.87 |
| ROI.19                                      | 2.27 | ROI.50 | 6.93 |
| ROI.20                                      | 2.29 | ROI.51 | 7.05 |
| ROI.21                                      | 2.46 | ROI.52 | 7.19 |
| ROI.22                                      | 2.50 | ROI.53 | 7.21 |
| ROI.23                                      | 2.58 | ROI.54 | 7.25 |
| ROI.24                                      | 2.60 | ROI.55 | 7.27 |
| ROI.25                                      | 2.62 | ROI.56 | 7.35 |
| ROI.26                                      | 2.92 | ROI.57 | 7.37 |
| ROI.27                                      | 3.03 | ROI.58 | 7.56 |
| ROI.28                                      | 3.15 | ROI.59 | 7.67 |
| ROI.29                                      | 3.22 | ROI.60 | 3.80 |
| ROI.30                                      | 3.29 | ROI.61 | 3.67 |
| ROI.31                                      | 3.59 | ROI.62 | 3.61 |

c

| Unknown <sup>1</sup> H Chemical Shift (ppm) |      |        |      |
|---------------------------------------------|------|--------|------|
| ROI.1                                       | 2.90 | ROI.35 | 2.92 |
| ROI.2                                       | 3.48 | ROI.36 | 3.03 |
| ROI.3                                       | 2.46 | ROI.37 | 3.40 |
| ROI.4                                       | 2.36 | ROI.38 | 3.65 |
| ROI.5                                       | 2.33 | ROI.39 | 3.67 |
| ROI.6                                       | 4.04 | ROI.40 | 3.68 |
| ROI.7                                       | 7.23 | ROI.41 | 3.75 |
| ROI.8                                       | 4.27 | ROI.42 | 3.86 |
| ROI.9                                       | 2.88 | ROI.43 | 3.87 |
| ROI.10                                      | 3.10 | ROI.44 | 3.90 |
| ROI.11                                      | 3.13 | ROI.45 | 4.06 |
| ROI.12                                      | 3.99 | ROI.46 | 4.10 |
| ROI.13                                      | 3.99 | ROI.47 | 4.46 |
| ROI.14                                      | 3.94 | ROI.48 | 4.47 |
| ROI.15                                      | 3.98 | ROI.49 | 4.59 |
| ROI.16                                      | 1.52 | ROI.50 | 4.60 |
| ROI.17                                      | 2.48 | ROI.51 | 4.61 |
| ROI.18                                      | 2.49 | ROI.52 | 4.61 |
| ROI.19                                      | 2.55 | ROI.53 | 5.09 |
| ROI.20                                      | 2.86 | ROI.54 | 5.10 |
| ROI.21                                      | 2.89 | ROI.55 | 5.13 |
| ROI.22                                      | 2.93 | ROI.56 | 5.86 |
| ROI.23                                      | 7.89 | ROI.57 | 5.92 |
| ROI.24                                      | 7.85 | ROI.58 | 6.05 |
| ROI.25                                      | 5.18 | ROI.59 | 6.06 |
| ROI.26                                      | 1.13 | ROI.60 | 6.07 |
| ROI.27                                      | 1.16 | ROI.61 | 6.13 |
| ROI.28                                      | 1.19 | ROI.62 | 6.82 |
| ROI.29                                      | 1.20 | ROI.63 | 7.73 |
| ROI.30                                      | 1.36 | ROI.64 | 7.67 |
| ROI.31                                      | 1.37 | ROI.65 | 7.91 |
| ROI.32                                      | 2.61 | ROI.66 | 7.96 |
| ROI.33                                      | 2.71 | ROI.67 | 8.59 |
| ROI.34                                      | 2.73 |        |      |

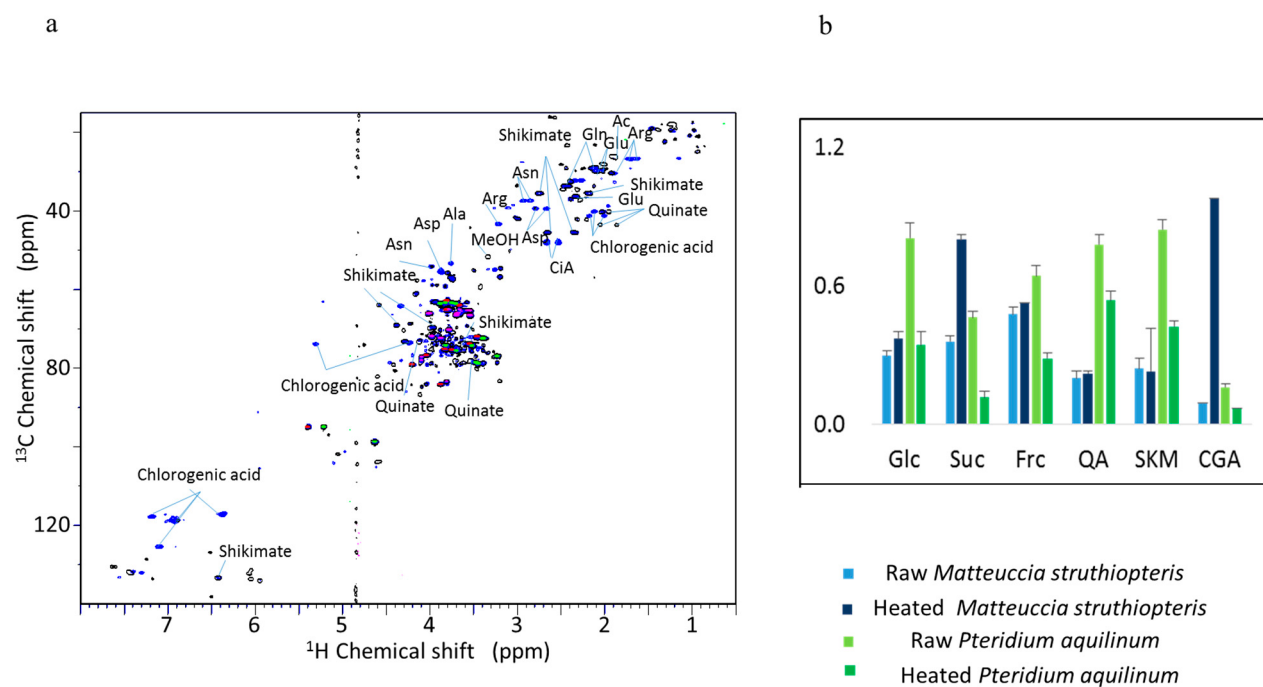

**Figure S3.**  $^1\text{H}$ - $^{13}\text{C}$  HSQC NMR spectra of *Pteridium aquilinum* and *Matteuccia struthiopteris* extracted by KPi/D $_2$ O solvent. (a) Black and blue line spectra are from *P. aquilinum* and *M. struthiopteris*, respectively. Green, red, and purple spectra are derived from glucose, sucrose, and fructose, respectively. Annotations for the referenced metabolites listed in Table S3. (b) Sugar group and organic acid compositions in raw or boiled *P. aquilinum* and *M. struthiopteris* are shown as a bar graph.

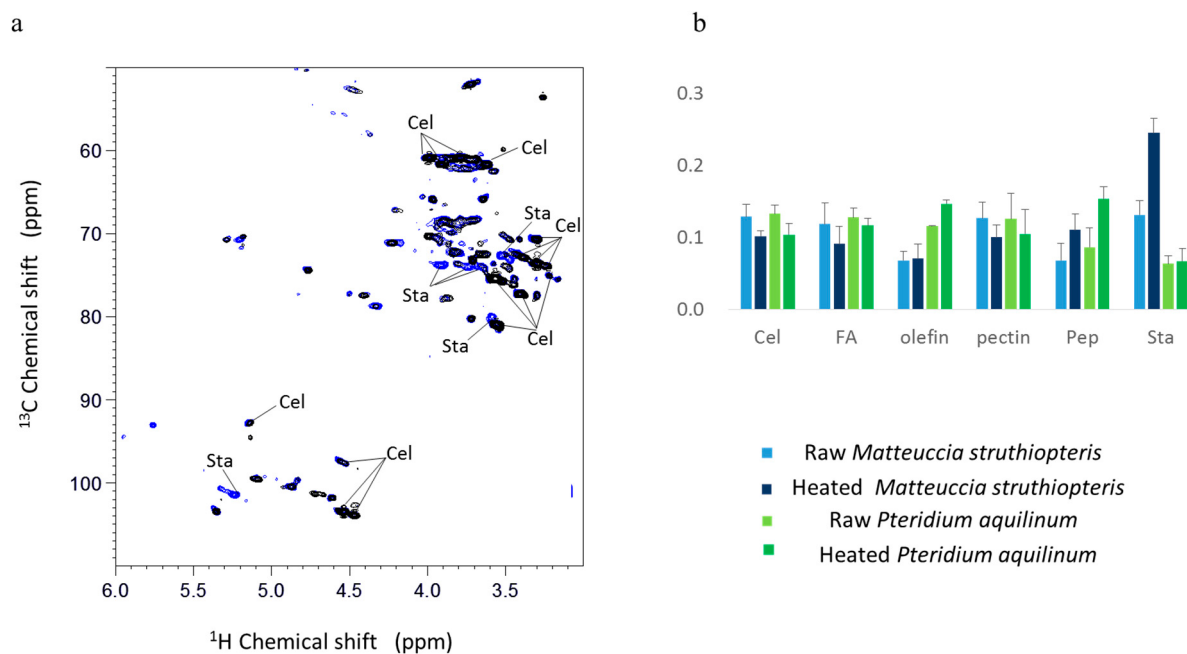

**Figure S4.**  $^1\text{H}$ - $^{13}\text{C}$  HSQC NMR spectra of *Pteridium aquilinum* and *Matteuccia struthiopteris* components extracted by DMSO-pyridine- $d_5$  (4:1) solvent. (a) Black and blue line spectra represent *Pteridium aquilinum* and *Matteuccia struthiopteris*, respectively. (b) Carbohydrate compositions in raw or boiled *P. aquilinum* and *M. struthiopteris* are shown as a bar graph.

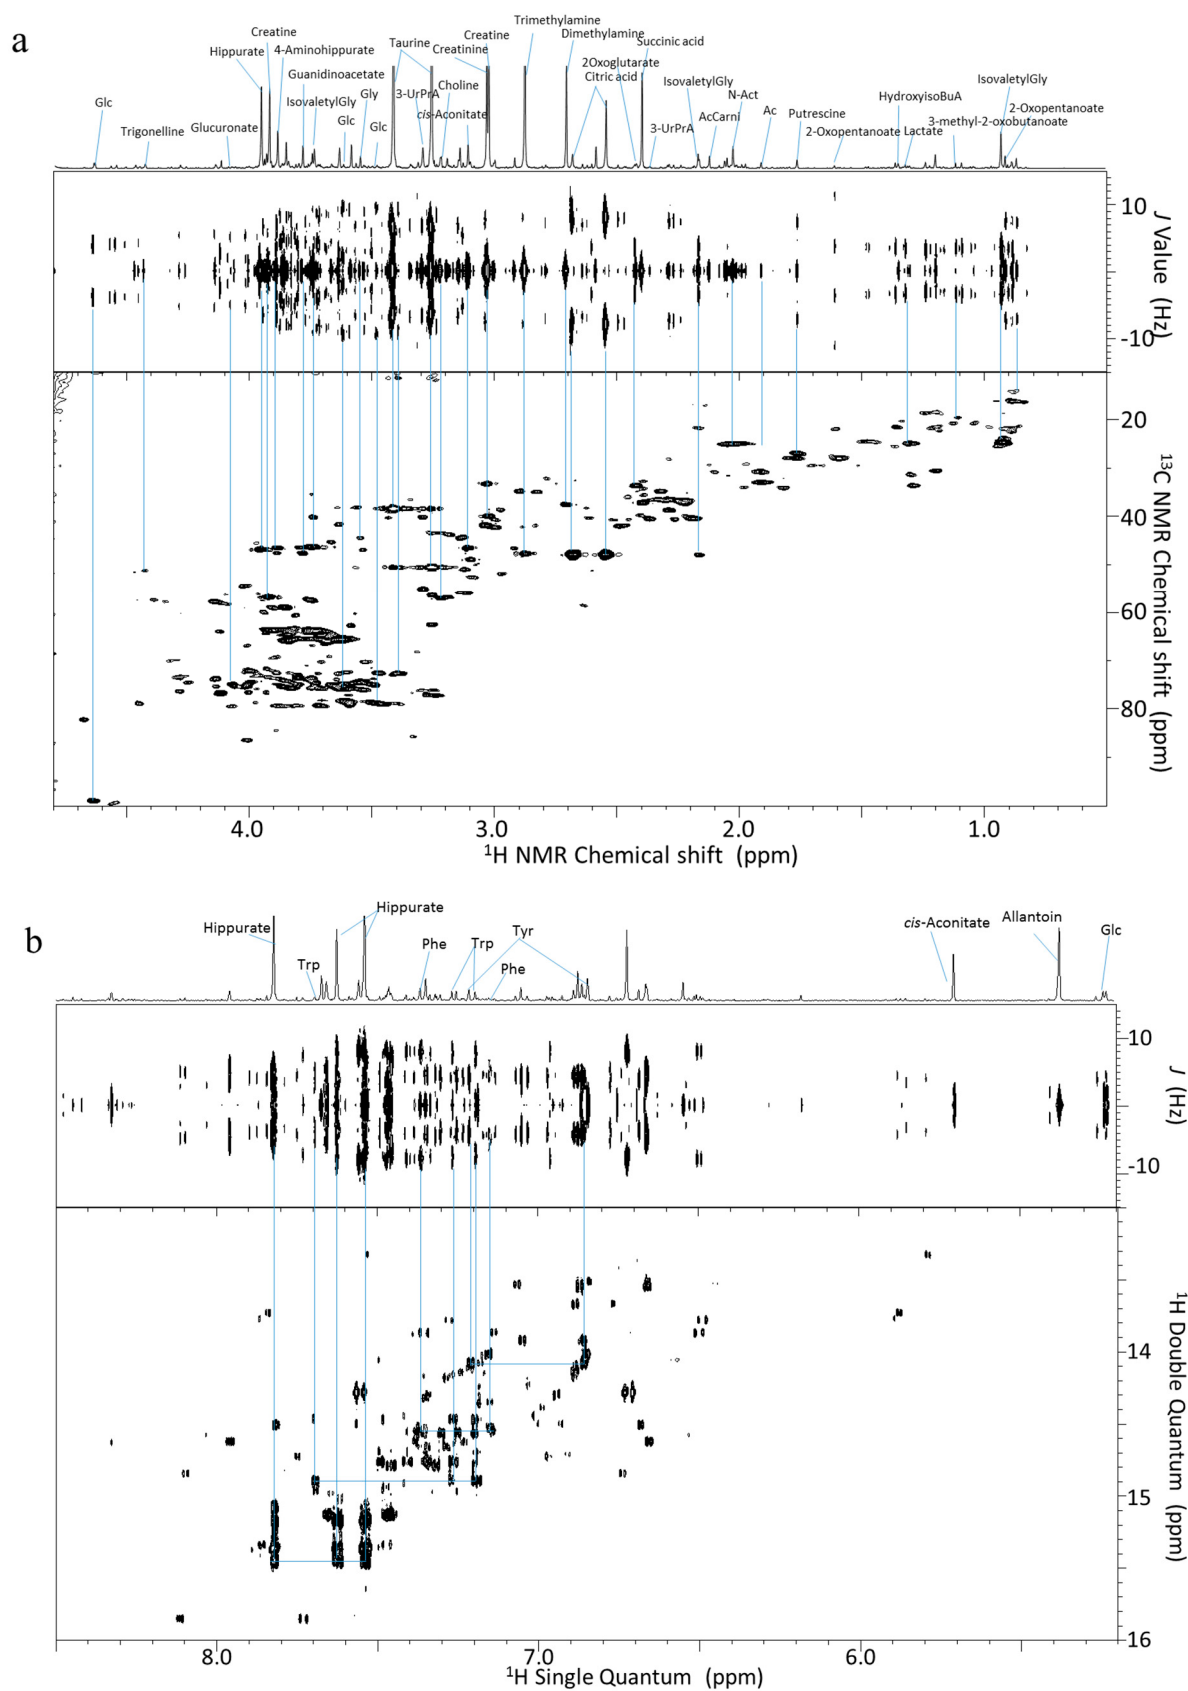

**Figure S5.** Annotation of metabolites in urine NMR spectra. Expanded version of  $^1\text{H}$  NMR spectra from treated mouse urine (top panel), 2D  $J$ -resolved NMR spectra (middle panel), and DQ-SQ NMR spectra (bottom panel) from 0.5 to 4.8 ppm (a), and 5.2 to 8.5 ppm (b). Annotations for the referenced metabolites listed in Table S3.

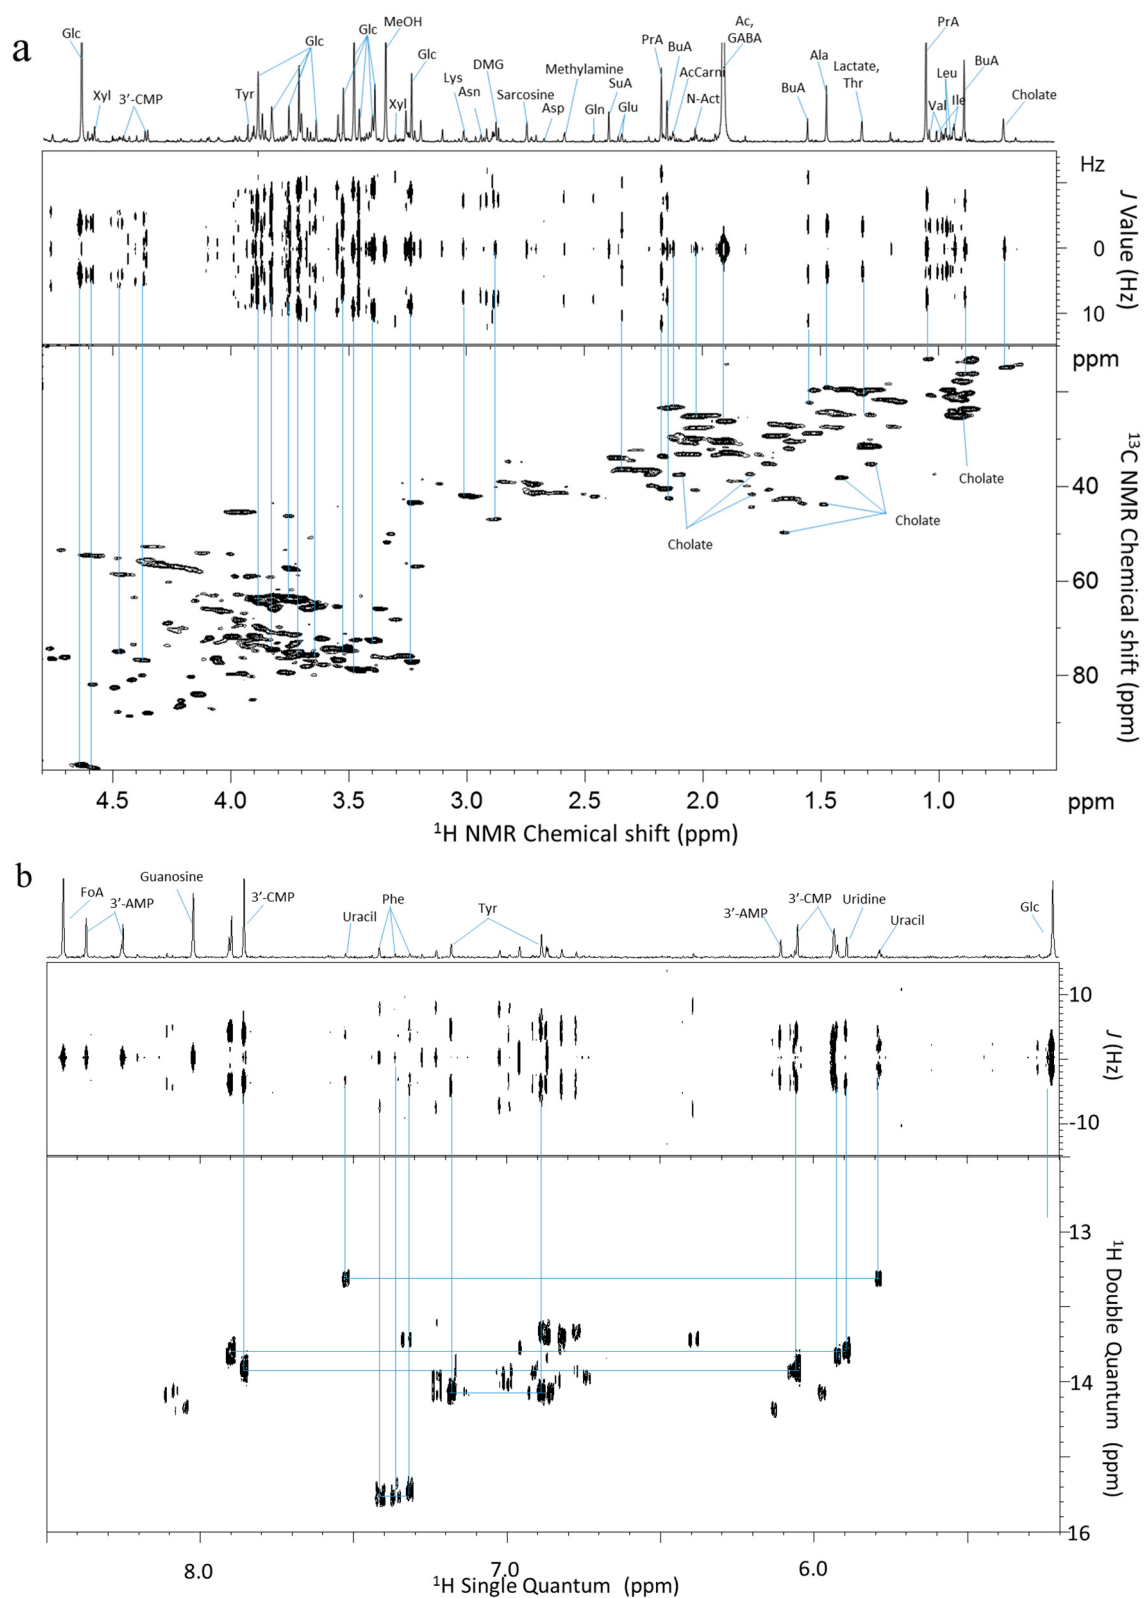

**Figure S6.** Annotation of metabolites in fecal NMR spectra. Expanded  $^1\text{H}$  NMR spectra from treated mouse feces (top panel), 2D  $J$ -resolved NMR spectra (middle panel), and DQ-SQ NMR spectra (bottom panel) from 0.5 to 4.8 ppm (a), and 5.2 to 8.5 ppm (b). Annotations for referenced metabolites listed in Table S3.

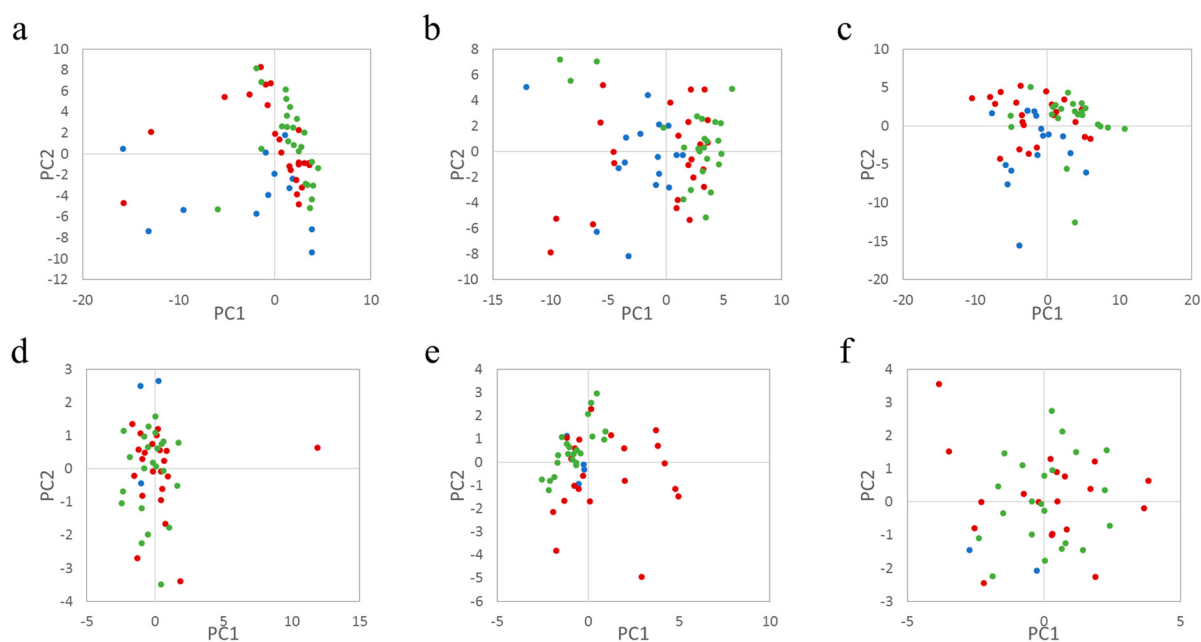

**Figure S7.** Principal component analysis of urinary metabolites and ions. Red, blue, and green spheres represent single data points from pretreatment, during treatment, and posttreatment, respectively. Upper panels indicate the results of urinary NMR measurement analyzed by PCA. The data based on experimentally treated mouse groups (a–c) administered cellulose, *Pteridium aquilinum*, and *Matteuccia struthiopteris*, respectively. (d–f) show PCA score plots for the ICP-OES data from each group. (d–f) represent ions of mice treated with cellulose, *Pteridium aquilinum*, and *M. struthiopteris* measured by ICP-OES, respectively. The data analysis was performed using the package “muma” in R [45].

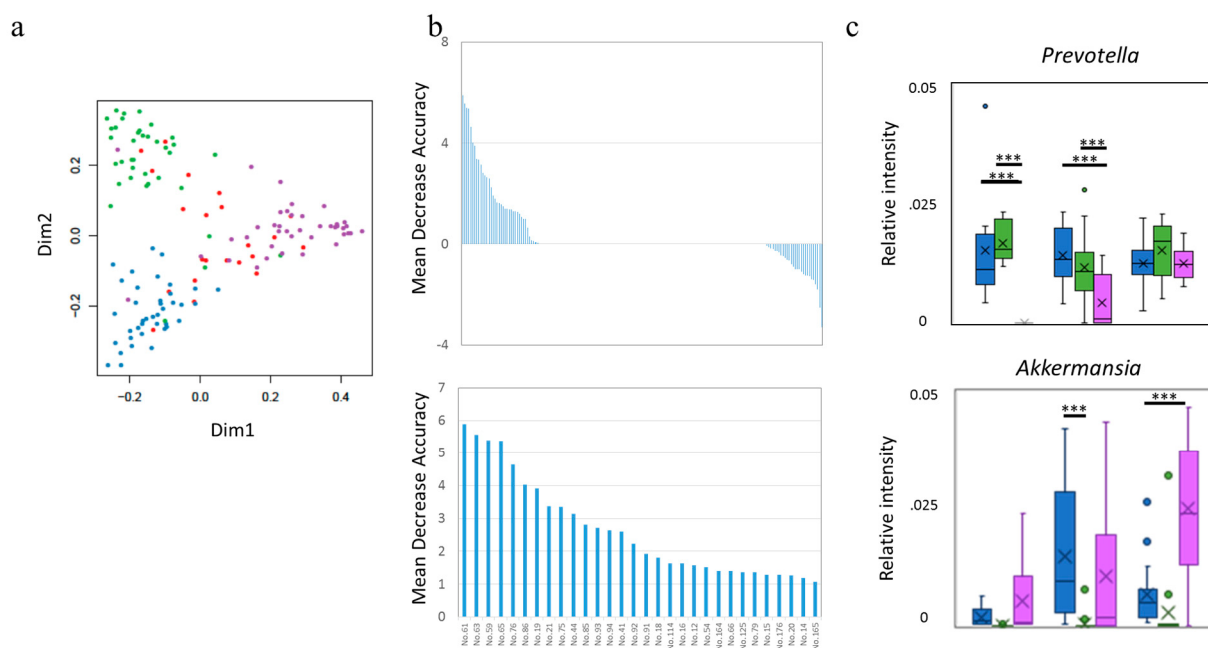

**Figure S8.** The results of Random Forest for the fecal microbiome. MDS plot (a) and factors important for separating the groups (b): upper panel indicates all important factors, while lower panel indicates the top 30 most important factors with annotation. In (a), red, blue, green, and purple spheres represent single data points from the pretreatment period of all groups, and cellulose-, *Pteridium aquilinum*-, and *Matteuccia struthiopteris*-treated groups, respectively. Boxplot of a representative important factor that can be applied on to network module (c). Upper panel and lower panel depict the genera *Prevotella* and *Akkermansia*, respectively. Blue, green, and purple boxes represent cellulose-, *P. aquilinum*-, and *M. struthiopteris*-treated groups, respectively. \*\*\*  $P < 0.001$  calculated by the Holm method.

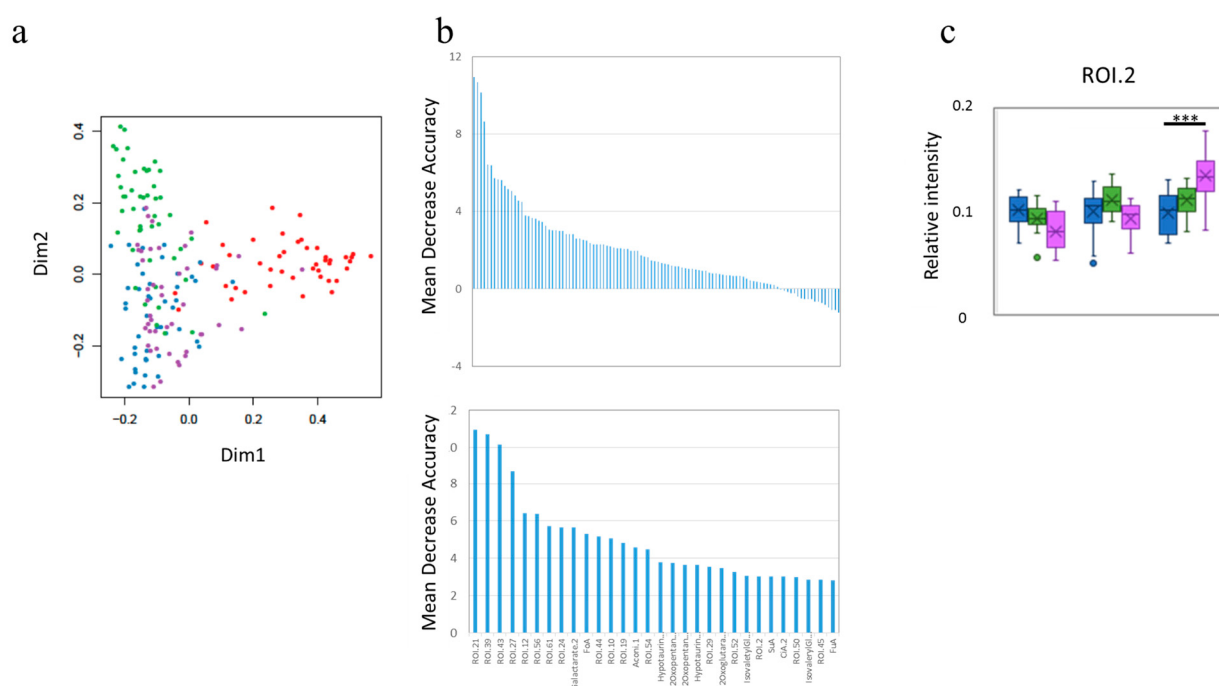

**Figure S9.** The results of Random Forest for urinary metabolites. MDS plot (a) and factors important for separating the groups (b): upper panel indicates all important factors, while lower panel indicates the top 30 most important factors with annotation. In (a), red, blue, green, and purple spheres represent single data points from the pretreatment period of all groups, and cellulose-, *Pteridium aquilinum*-, and *Matteuccia struthiopteris*-treated groups, respectively. Boxplot of a representative important factor that can be applied onto network module, which depicts ROI.2 (c). Blue, green, and purple boxes represent cellulose-, *P. aquilinum*-, and *M. struthiopteris*-treated groups, respectively. \*\*\*  $P < 0.001$  calculated by the Holm method.

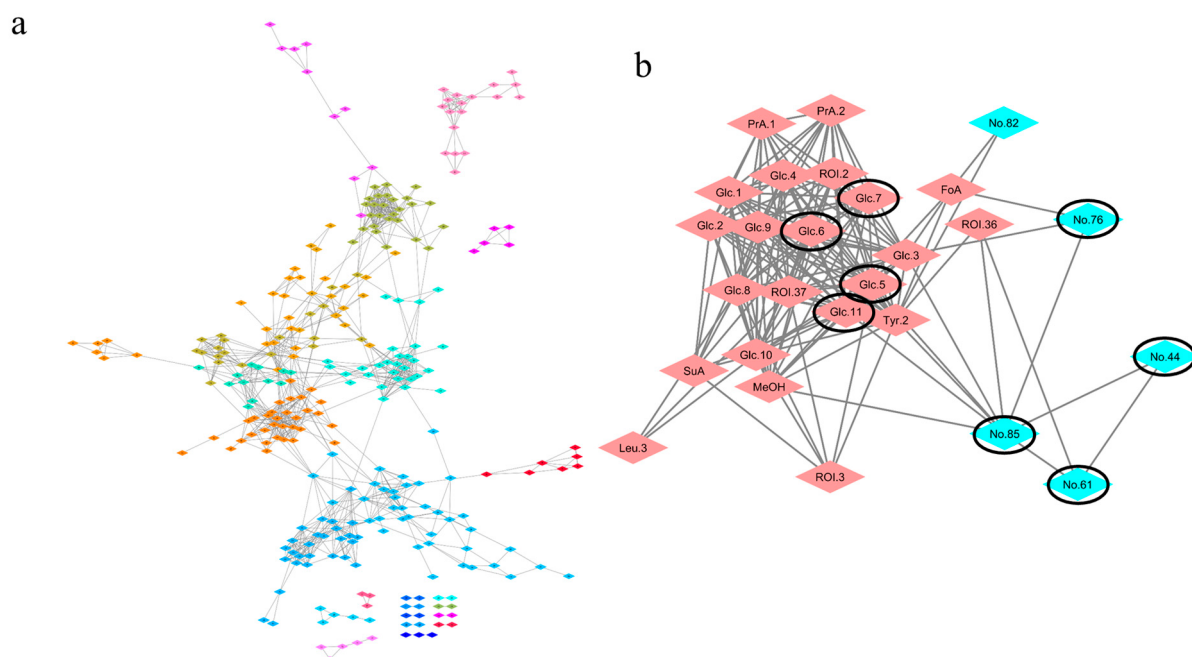

**Figure S10.** Network community correlation coefficients for *Matteuccia struthiopteris*-treated mice based on the combined data set. The network depiction is based on calculations by the igraph package with Cytoscape. All communities of *Matteuccia struthiopteris*-treated mice are depicted (a). The same color diamonds represent components belonging to the same community. The glucose community in *M. struthiopteris*-treated mice is depicted (b). Black-line-circled diamonds represent factors selected by Random Forest as being important for separating the groups (Table S3).

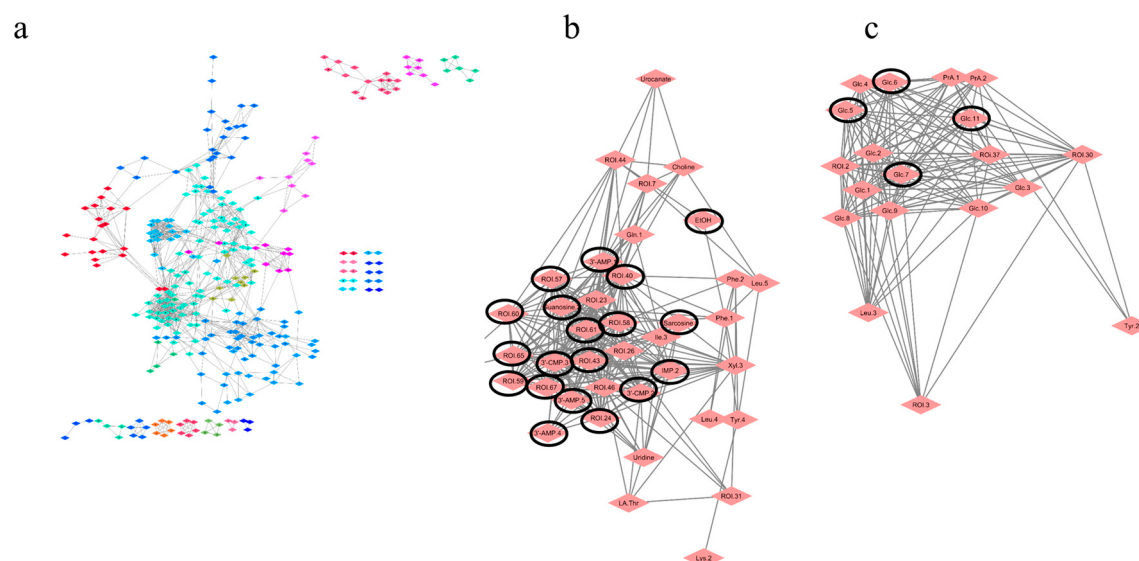

**Figure S11.** Network community correlation coefficients for *Pteridium aquilinum*-treated mice based on the combined data set. The network depiction is based on calculations by the igraph package with Cytoscape. All communities of *P. aquilinum*-treated mice are depicted (a). The same color diamonds represent components belonging to the same community. Purine/pyrimidine and glucose communities in *Matteuccia struthiopteris*-treated mice are indicated in (b) and (c), respectively. Black-line-circled diamonds represent factors selected by Random Forest as being important for separating the groups (TableS3).
